# Supplementary material
Source: ML conference proceedings conference paper supplement (https://openaccess.thecvf.com/content/CVPR2026/html/Liu_FinPercep-RM_A_Fine-grained_CVPR_2026_paper.html)
Supplement: Supplementary file 1 [file Liu_FinPercep-RM_A_Fine-grained_CVPR_2026_supplemental.pdf]

# FinPercep-RM: A Fine-grained Reward Model and Co-evolutionary Curriculum for RL-based Real-world Super-Resolution

## Supplementary Material

### 1. Detailed Formulations of Alignment Algorithms

This section details the mathematical formulations of the three primary Reinforcement Learning from Human Feedback strategies discussed in the main paper: Reward Feedback Learning [8], Direct Preference Optimization (DPO) for diffusion [5], and Group Relative Policy Optimization [3]. We demonstrate how our FinPercep-RM can be integrated into each framework.

#### 1.1. Reward Feedback Learning (ReFL)

ReFL [8] is a direct optimization method designed to fine-tune diffusion models using feedback from a reward model without the need for a complex PPO pipeline. It leverages the observation that image quality becomes identifiable at the later stages of denoising.

**Formulation.** Let  $\epsilon_\theta(x_t, t, c)$  be the noise prediction network with parameters  $\theta$ , where  $x_t$  is the latent at timestep  $t$ , and  $c$  is the text prompt. ReFL randomly samples a timestep  $t \in [T_{start}, T_{end}]$  (typically late steps, e.g., [30, 40] for a 40-step scheduler). It then predicts the clean latent  $x_0$  directly from  $x_t$ :

$$\hat{x}_0 = \frac{x_t - \sqrt{1 - \alpha_t} \epsilon_\theta(x_t, t, c)}{\sqrt{\alpha_t}}, \quad (1)$$

where  $\alpha_t$  denotes the noise schedule parameters. The predicted image  $I_{pred} = \mathcal{D}(\hat{x}_0)$  is then scored by our FinPercep-RM  $R(\cdot)$ . The ReFL objective is:

$$\mathcal{L}_{\text{ReFL}}(\theta) = \lambda \mathbb{E}_{c \sim \mathcal{Y}} [\phi(R(I_{pred}))] + \mathbb{E}_{(c, x) \sim \mathcal{D}_{pre}} [\|\epsilon - \epsilon_\theta(x_t, t, c)\|_2^2], \quad (2)$$

where  $\phi(\cdot)$  is a weighting function (e.g., ReLU) and the second term is a pre-training regularization.

#### 1.2. Diffusion Direct Preference Optimization (Diffusion-DPO)

Diffusion-DPO [5] reformulates the RLHF objective to directly optimize the policy on preference pairs  $(x^w, x^l)$  using the Evidence Lower Bound (ELBO) as a proxy for log-likelihood.

**Derivation.** The objective encourages the model to lower the denoising error for the preferred image  $x^w$  relative to a

frozen reference model  $\theta_{\text{ref}}$ , while allowing the error for the rejected image  $x^l$  to increase:

$$\mathcal{L}_{\text{DPO}}(\theta) = -\mathbb{E}_{(x^w, x^l, c), t, \epsilon} \left[ \log \sigma \left( -\frac{\beta}{2} (\delta_{\text{MSE}}(x^w) - \delta_{\text{MSE}}(x^l)) \right) \right], \quad (3)$$

where  $\delta_{\text{MSE}}(x) = \|\epsilon - \epsilon_\theta(x_t, t, c)\|_2^2 - \|\epsilon - \epsilon_{\text{ref}}(x_t, t, c)\|_2^2$ . In our context, the pairs  $(x^w, x^l)$  are labelled using the score  $S_{fgc-global}$  from our FinPercep-RM.

#### 1.3. Group Relative Policy Optimization (Flow-GRPO)

Flow-GRPO [3] introduces Group Relative Policy Optimization to Flow Matching models. It computes advantage without a value network by using group statistics.

**ODE-to-SDE Conversion.** To enable exploration, the deterministic ODE  $dx_t = v_t dt$  is converted into an SDE:

$$dx_t = \left( v_t(x_t) - \frac{\sigma_t^2}{2} \nabla \log p_t(x_t) \right) dt + \sigma_t dw. \quad (4)$$

**Objective.** For a prompt  $c$ , a group of  $G$  outputs  $\{x_0^i\}_{i=1}^G$  is generated. The advantage  $A_i$  is normalized within the group based on rewards  $R_i$  from FinPercep-RM:

$$A_i = \frac{R_i - \text{mean}(\{R_1, \dots, R_G\})}{\text{std}(\{R_1, \dots, R_G\}) + \epsilon}. \quad (5)$$

The GRPO objective is:

$$\mathcal{J}_{\text{GRPO}}(\theta) = \mathbb{E} \left[ \frac{1}{G} \sum_{i=1}^G \left( \min(\rho_i A_i, \text{clip}(\rho_i, 1 - \epsilon, 1 + \epsilon) A_i) - \beta D_{\text{KL}}(\pi_\theta \| \pi_{\text{ref}}) \right) \right]. \quad (6)$$

## 2. Extended Ablation and Comparison Studies

### 2.1. Ablation on Loss Components

To rigorously evaluate the contribution of each loss term in our training objective, we performed a step-wise ablation study. We start with the baseline ranking loss and progressively incorporate the map loss and alignment loss. The results, presented in Table 1, confirm that each component provides a cumulative benefit to the final perceptual quality.

| Model       | $\mathcal{L}_{rank}$ | $\mathcal{L}_{map}$ | $\mathcal{L}_{align}$ | MUSIQ $\uparrow$ | MANIQA $\uparrow$ |
|-------------|----------------------|---------------------|-----------------------|------------------|-------------------|
| A           | ✓                    | ✗                   | ✗                     | 71.052           | 0.628             |
| B           | ✓                    | ✓                   | ✗                     | 72.804           | 0.651             |
| <b>Full</b> | ✓                    | ✓                   | ✓                     | <b>73.456</b>    | <b>0.658</b>      |

Table 1. Ablation study on the training objectives of FinPercep-RM. We progressively add the ranking loss, fine-grained map loss, and anchor alignment loss. Model A represents a standard preference model baseline; Model B incorporates fine-grained spatial supervision; the Full model adds score alignment for stability across training stages.

## 2.2. Performance Comparison with Other Reward Models

To demonstrate the superiority of our proposed **FinPercep-RM** in the context of Real-ISR, we conducted a comparative experiment against several state-of-the-art reward models widely used in the Text-to-Image (T2I) domain. Specifically, we compared our method with **ImageReward** [8], **HPSv2** [7], **PickScore** [2], **CLIP Score** [1], and **Aesthetic Score** [4].

| Reward Model               | MUSIQ $\uparrow$ | MANIQA $\uparrow$ |
|----------------------------|------------------|-------------------|
| Aesthetic Score [4]        | 71.12            | 0.589             |
| CLIP Score [1]             | 70.56            | 0.591             |
| PickScore [2]              | 71.65            | 0.605             |
| HPSv2 [7]                  | 72.03            | 0.618             |
| ImageReward [8]            | 71.56            | 0.628             |
| <b>FinPercep-RM (Ours)</b> | <b>73.45</b>     | <b>0.658</b>      |

Table 2. Quantitative comparison with state-of-the-art T2I reward models on the ReallQ250 benchmark. Our FinPercep-RM significantly outperforms general-purpose reward models in the ISR task, indicating the necessity of fine-grained defect awareness.

## 3. Additional Qualitative Results

We provide additional visual comparisons on real-world datasets to demonstrate the robustness of our method. As shown in Fig. 1, our method generates more plausible details while effectively suppressing artifacts, yielding the best visual results.

## 4. FinPercep-RM Architecture Details

The FinPercep-RM adopts an Encoder-Decoder architecture designed to simultaneously predict a global quality score and a local degradation map.

### 4.1. Encoder

We utilize the CLIP-IQA model [6] as the backbone encoder. It processes the input image into a sequence of patch embeddings. We extract multi-scale feature maps  $\{f_i\}_{i=1}^4$

from intermediate transformer layers to capture hierarchical visual information. Specifically, given an input image  $I \in \mathbb{R}^{H \times W \times 3}$ , the encoder outputs features from layers  $\{6, 12, 18, 24\}$  of the backbone, ensuring that both low-level texture information and high-level semantic information are preserved for the subsequent decoding task.

### 4.2. Decoder

The decoder consists of a Feature Pyramid Network (FPN)-like structure.

- **Lateral Connections:** Each selected feature map  $f_i$  from the encoder is projected to a common channel dimension via  $1 \times 1$  convolutions.
- **Upsampling Path:** Lower-resolution features are upsampled and added to higher-resolution features.
- **Prediction Head:** The final fused feature map is passed through two  $3 \times 3$  convolution layers followed by a Sigmoid activation to produce the Perceptual Degradation Map ( $M_{fg-pdm}$ ).

### 4.3. Global Score Head

The global score is computed by spatially weighting the encoder’s final semantic feature  $f_{final}$  with the predicted degradation map:

$$f_{weighted} = f_{final} \odot \text{Downsample}(M_{fg-pdm}). \quad (7)$$

This weighted feature vector is then fed into a 3-layer MLP to regress the scalar quality score  $S_{fgc-global}$ . This mechanism explicitly forces the global score to be aware of local defects identified by the decoder.

## 5. Implementation and Training Details

### 5.1. FinPercep-RM Training

- **Loss Weights:** In Eq. (8) of the main paper, we set  $\lambda_{map} = 1$ ,  $\lambda_{rank} = 0.8$ , and  $\lambda_{align} = 0.6$ . The high weight on the map loss enforces accurate localization.
- **Optimizer:** AdamW with  $\beta_1 = 0.9$ ,  $\beta_2 = 0.999$ , weight decay  $1e - 4$ .
- **Learning Rate:**  $1e - 5$  for the encoder backbone (fine-tuning) and  $1e - 4$  for the newly added decoder and MLP head. Cosine annealing scheduler.
- **Batch Size:** 64. Trained for 50 epochs on FGR-30k.

### 5.2. Co-evolutionary Curriculum Learning (CCL)

The CCL training process is structured into  $N = 3$  stages to balance stability and performance. The detailed configuration is as follows:

- **Training Schedule:** Each stage consists of **10,000 steps**, totaling 30,000 steps for the complete training process.
- **Learning Rate:** The initial learning rate is set to  $1 \times 10^{-5}$  and decays according to a **cosine annealing** schedule.

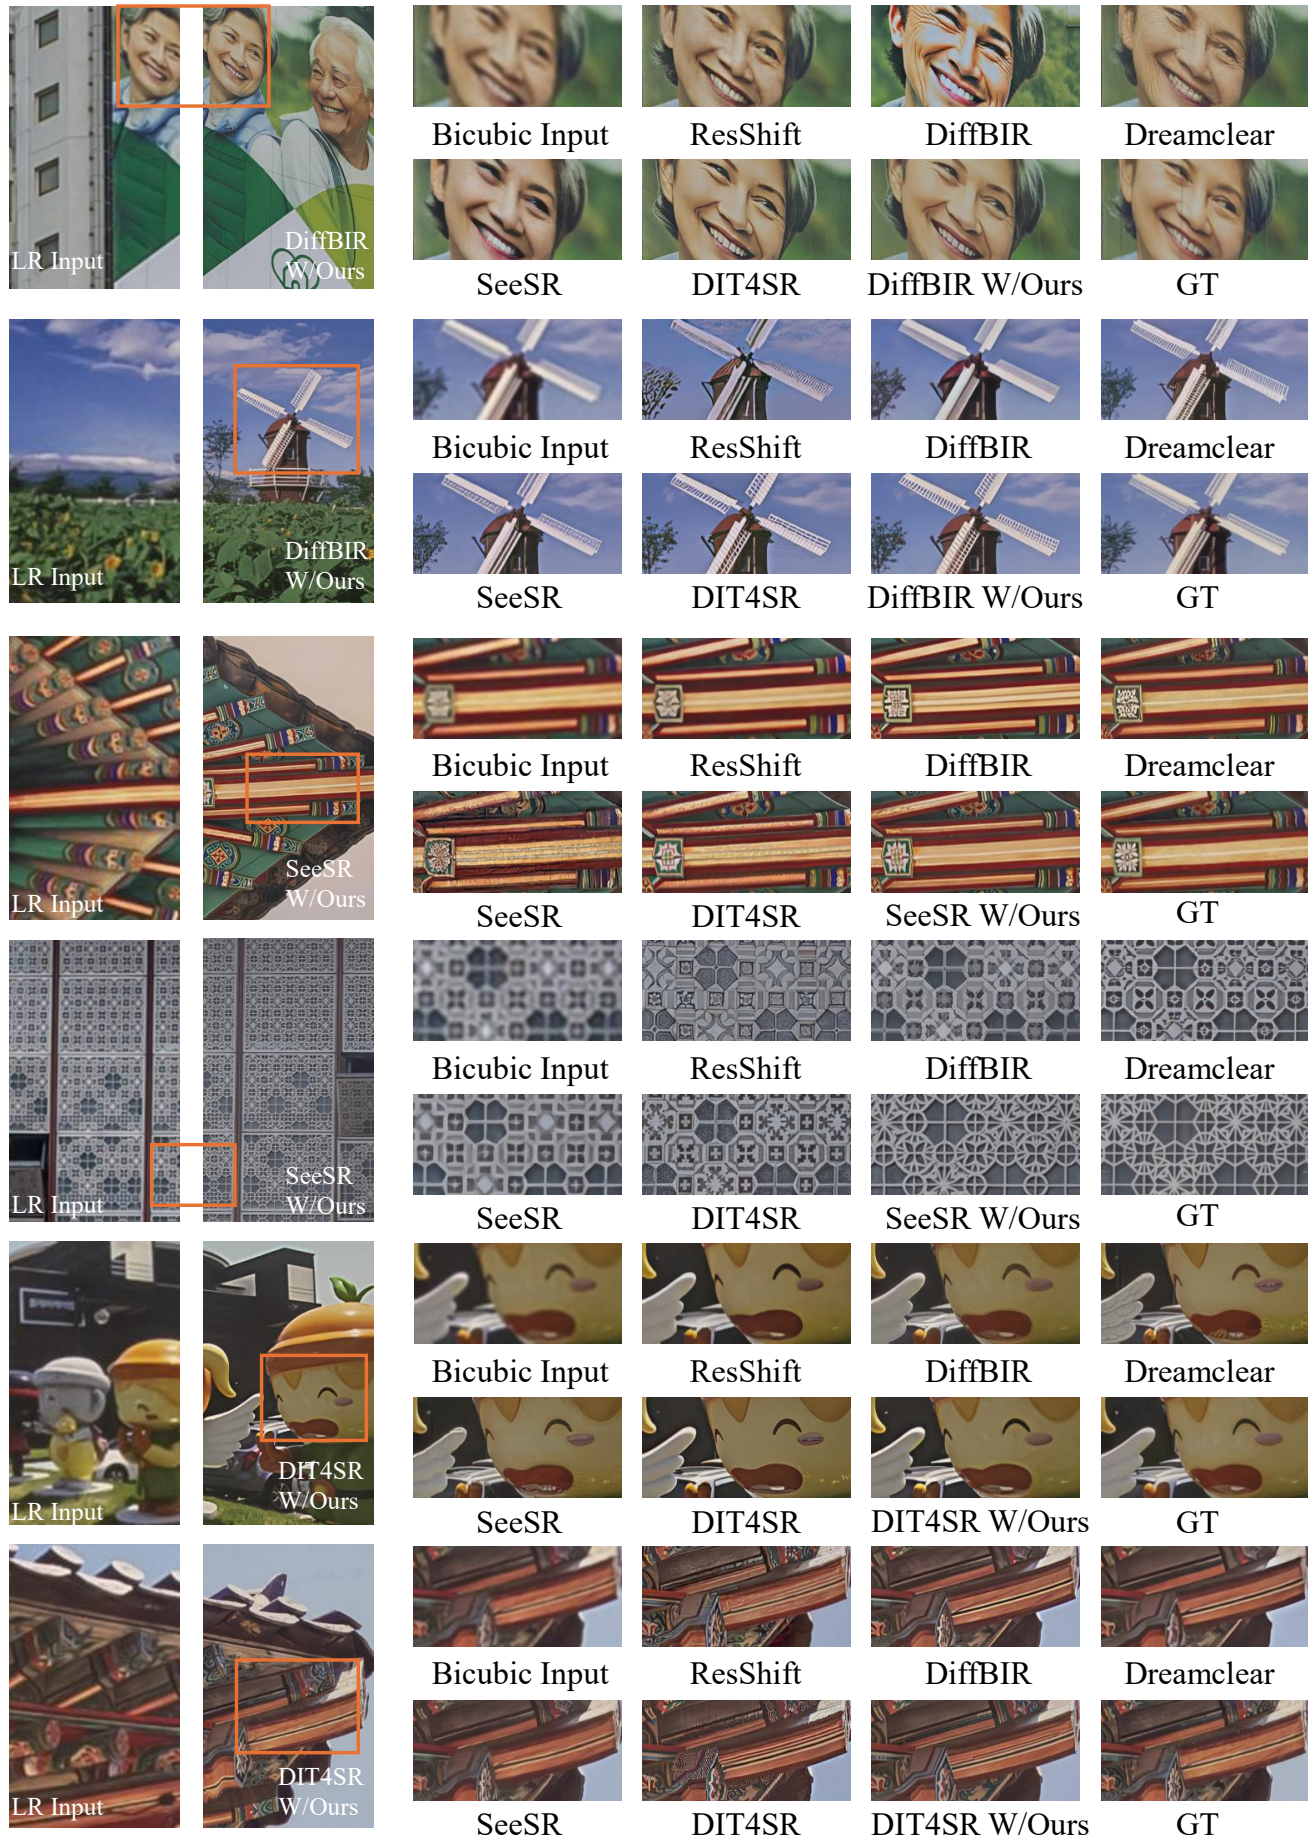

Figure 1. Qualitative comparisons with state-of-the-art Real-ISR methods on on RealSR based on RLHF method of REFL [8].

- **Stage 0 (Warm-up):** The Generator is trained using the frozen CLIP-IQA ( $RM_0$ ) reward. This stage ensures initial stability by optimizing for global perceptual quality without the complexity of fine-grained local feedback.
- **Stage 1 (Partial Expansion):** The FinPercep-RM introduces a lightweight version of the decoder with fewer parameters. This allows the Generator to adapt to coarse-grained local defect penalties without being overwhelmed by high-frequency signals.
- **Stage 2 (Full Expansion):** The full parameters of the FinPercep-RM decoder and adapters are activated. The Generator fine-tunes against this fully capable reward model to meticulously refine local textures and eliminate subtle artifacts.

## 6. User Study Configuration

To rigorously evaluate perceptual quality, we conducted a user study with 20 human raters.

**Interface.** Raters were presented with a web interface showing the Low-Resolution input (for reference) and two super-resolved images side-by-side (Ours vs. Baseline, randomized order).

**Criteria.** Raters were asked to select the better image based on two distinct criteria:

1. **Fidelity:** Which image better preserves the identity and structure of the original content?
2. **Realism:** Which image looks more like a natural photograph, free from AI-generated artifacts or over-smoothing?

**Dataset.** We randomly sampled 50 images from each of the four test datasets (Total = 200 comparisons per rater). The results reported in the main paper (Table 2) are the averaged preference rates.

## 7. Broader Impacts

Our work on fine-grained perceptual reward models for Real-ISR has potential positive impacts but also carries certain risks that must be acknowledged.

### Positive Impacts.

- **Restoration of Historical Archives:** Our method can significantly improve the quality of restoring old photographs and films, helping to preserve cultural heritage with higher fidelity.
- **Medical Imaging:** In medical scenarios where high-resolution details are crucial (e.g., MRI or CT scans), our fine-grained perception approach could potentially aid in clearer visualization, though rigorous validation is needed before clinical use.

- **Content Creation:** The ability to generate high-fidelity textures benefits the creative industry, including game development and VFX, by reducing the manual effort required for texture upscaling.

### Potential Risks and Mitigation.

- **Hallucination and Misinformation:** Like all generative SR models, our method may hallucinate plausible but non-existent details. In contexts like surveillance or forensics, this could lead to misidentification. We strongly advise against using generative SR for legal evidence without expert verification.
- **Bias Amplification:** If the training data (e.g., FGR-30k or the pre-trained T2I priors) contains biases regarding race, gender, or age, the model might hallucinate biased features during restoration (e.g., changing facial characteristics). We plan to audit our FGR-30k dataset for demographic balance in future work.
- **Deepfakes:** The enhanced realism could be misused to create convincing deepfakes. We support the development of robust detection methods and digital watermarking to trace AI-generated content.

## References

- [1] Jack Hessel, Ari Holtzman, Maxwell Forbes, Ronan Le Bras, and Yejin Choi. CLIPScore: A reference-free evaluation metric for image captioning. In *Proceedings of the 2021 Conference on Empirical Methods in Natural Language Processing*, pages 7514–7528, Online and Punta Cana, Dominican Republic, 2021. Association for Computational Linguistics. 2
- [2] Yuval Kirstain, Adam Polyak, Uriel Singer, Shahbuland Matiana, Joe Penna, and Omer Levy. Pick-a-pic: An open dataset of user preferences for text-to-image generation. *Advances in neural information processing systems*, 36:36652–36663, 2023. 2
- [3] Jie Liu, Gongye Liu, Jiajun Liang, Yangguang Li, Jiaheng Liu, Xintao Wang, Pengfei Wan, Di Zhang, and Wanli Ouyang. Flow-grpo: Training flow matching models via online rl. *arXiv preprint arXiv:2505.05470*, 2025. 1
- [4] Christoph Schuhmann, Romain Beaumont, Richard Vencu, Cade Gordon, Ross Wightman, Mehdi Cherti, Theo Coombes, Aarush Katta, Clayton Mullis, Mitchell Wortsman, et al. Laion-5b: An open large-scale dataset for training next generation image-text models. *Advances in neural information processing systems*, 35:25278–25294, 2022. 2
- [5] Bram Wallace, Meihua Dang, Rafael Rafailov, Linqi Zhou, Aaron Lou, Senthil Purushwalkam, Stefano Ermon, Caiming Xiong, Shafiq Joty, and Nikhil Naik. Diffusion model alignment using direct preference optimization. In *Proceedings of the IEEE/CVF Conference on Computer Vision and Pattern Recognition*, pages 8228–8238, 2024. 1
- [6] Jianyi Wang, Kelvin CK Chan, and Chen Change Loy. Exploring clip for assessing the look and feel of images. In *Proceedings of the AAAI conference on artificial intelligence*, pages 2555–2563, 2023. 2

- [7] Xiaoshi Wu, Yiming Hao, Keqiang Sun, Yixiong Chen, Feng Zhu, Rui Zhao, and Hongsheng Li. Human preference score v2: A solid benchmark for evaluating human preferences of text-to-image synthesis. *arXiv preprint arXiv:2306.09341*, 2023. [2](#)
- [8] Jiazheng Xu, Xiao Liu, Yuchen Wu, Yuxuan Tong, Qinkai Li, Ming Ding, Jie Tang, and Yuxiao Dong. Imagereward: learning and evaluating human preferences for text-to-image generation. In *Proceedings of the 37th International Conference on Neural Information Processing Systems*, pages 15903–15935, 2023. [1](#), [2](#), [3](#)
